1     **Opposing roles of dopamine receptor D1- and D2-expressing neurons**  
2     **in the anteromedial olfactory tubercle in acquisition of place preference**  
3                                     **in mice**

4     **Koshi Murata<sup>1,2</sup>, Tomoki Kinoshita<sup>1</sup>, Yugo Fukazawa<sup>1,2,3</sup>, Kenta Kobayashi<sup>4</sup>, Akihiro**  
5     **Yamanaka<sup>5</sup>, Takatoshi Hikida<sup>6</sup>, Hiroyuki Manabe<sup>7</sup>, and Masahiro Yamaguchi<sup>8</sup>**

6     1. Division of Brain Structure and Function, Faculty of Medical Sciences, University of Fukui,  
7     Fukui, Japan

8     2. Life Science Innovation Center, Faculty of Medical Science, University of Fukui, Fukui 910-1193,  
9     Japan

10    3. Research Center for Child Mental Health Development, Faculty of Medical Sciences, University  
11    of Fukui, Fukui 910-1193, Japan

12    4. Section of Viral Vector Development, National Institute for Physiological Sciences, Aichi 444-  
13    8585, Japan

14    5. Department of Neuroscience II, Research Institute of Environmental Medicine, Nagoya University,  
15    Aichi 464-8601, Japan

16    6. Laboratory for Advanced Brain Functions, Institute for Protein Research, Osaka University, Osaka  
17    565-0871, Japan

18    7. Laboratory of Neural Information, Graduate School of Brain Science, Doshisha University, Kyoto  
19    610-0394, Japan

20    8. Department of Physiology, Kochi Medical School, Kochi University, Kochi 783-8505, Japan

21    \* **Correspondence:**  
22    Koshi Murata, Ph.D.  
23    kmurata@u-fukui.ac.jp

24    **Keywords: olfactory tubercle, attractive behavior, aversive behavior, place preference,**  
25    **optogenetics, medium spiny neurons, dopamine receptor D1, dopamine receptor D2**

26

27 **Abstract**

28 Olfaction induces adaptive motivated behaviors. Odors associated with food induce attractive  
29 behavior, whereas those associated with dangers induce aversive behavior. We previously reported  
30 that learned odor-induced attractive and aversive behaviors accompany activation of the olfactory  
31 tubercle (OT) in a domain- and cell type-specific manner. Odor cues associated with a sugar reward  
32 induced attractive behavior and c-fos expression in the dopamine receptor D1-expressing neurons  
33 (D1 neurons) in the anteromedial OT. In contrast, odor cues associated with electrical shock induced  
34 aversive behavior and c-fos expression in the D2 neurons in the anteromedial OT, as well as the D1  
35 neurons in the lateral OT. Here, we investigated whether the D1 and D2 neurons in the anteromedial  
36 OT play distinct roles in attractive or aversive behaviors, using optogenetic stimulation and real-time  
37 place preference (RTPP) tests. Mice expressing ChETA (ChR2/E123T)-EYFP in the D1 neurons in  
38 the anteromedial OT spent a longer time in the photo-stimulation side of the place preference  
39 chamber than the control mice expressing EYFP. On the other hand, upon optogenetic stimulation of  
40 the D2 neurons in the anteromedial OT, the mice spent a shorter time in the photo-stimulation side  
41 than the control mice. Local neural activation in the anteromedial OT during the RTPP tests was  
42 confirmed by c-fos mRNA expression. These results suggest that the D1 and D2 neurons in the  
43 anteromedial OT play distinct roles in attractive and aversive behaviors, respectively.

44

## 45 1 Introduction

46 Odor sensation elicits various motivations, which enable adaptive behavioral responses such as  
47 obtaining food rewards or avoiding potential dangers (Doty, 1986). Although some odorants elicit  
48 innate motivated behaviors in mice, such as fear responses to predator odors (Kobayakawa et al.,  
49 2007; Saito et al., 2017) or attractive responses to social odors (Inokuchi et al., 2017), animals can  
50 acquire appropriate behaviors to odor cues according to their experience, through odor-reward or  
51 odor-danger associative learning. However, the neural circuit mechanisms engaged in these odor-  
52 induced adaptive behaviors are still unclear.

53 Recent studies have revealed the importance of the olfactory tubercle (OT) in the odor-  
54 induced motivated behaviors (DiBenedictis et al., 2015; Gadziola et al., 2015; Yamaguchi, 2017;  
55 Zhang et al., 2017a; Murofushi et al., 2018). The OT is a part of the olfactory cortex that receives  
56 olfactory inputs directly from the olfactory bulb as well as indirectly from other parts of the olfactory  
57 cortex and the orbitofrontal cortex (Shepherd, 2004; Zhang et al., 2017b). The OT is also a part of the  
58 ventral striatum, in addition to the nucleus accumbens (NAc), that receives massive dopaminergic  
59 inputs from the ventral tegmental area (Ikemoto, 2007; Zhang et al., 2017b; Poulin et al., 2018). The  
60 OT is composed of three major types of neurons: medium spiny neurons, dwarf cells, and granule  
61 cells (Millhouse and Heimer, 1984; Xiong and Wesson, 2016). The medium spiny neurons are  
62 distributed in the whole OT, forming the layer II (dense cell layer) of the cortex-like region  
63 (Millhouse and Heimer, 1984). A majority of the medium spiny neurons in the OT as well as the  
64 NAc and dorsal striatum express either dopamine receptor D1 or D2 (Yung et al., 1995; Murata et al.,  
65 2015). Dwarf cells are clustered in the lateral part of the OT, forming the cap region, which is  
66 interspersed throughout the antero-posterior axis (Hosoya and Hirata, 1974; Murata et al., 2015). The  
67 dwarf cells are considered a smaller type of the medium spiny neurons, and express D1 but not D2  
68 (Murata et al., 2015). Granule cells are clustered through the anteromedial surface to the central deep  
69 part of the OT, forming the Islands of Calleja, which is presumably a continuous structure (Fallon et  
70 al., 1978; de Vente et al., 2001). The granule cells weakly express D1, and do not express D2  
71 (Murata et al., 2015). In addition to these three types of neurons in the striatal component, the OT  
72 contains the ventral pallidal component and axon bundles that project from the striato-pallidal  
73 structure to other brain areas, forming the medial forebrain bundle (Heimer, 1978).

74 In our previous study, we divided the OT into domains, using the cap and Islands of Calleja  
75 as a landmark, and mapped *c-fos* expression when mice showed learned odor-induced attractive or  
76 aversive behaviors (Murata et al., 2015). Odor cues associated with a sugar reward induced attractive  
77 behavior and *c-fos* expression in the D1-expressing neurons (D1 neurons) in the cortex-like region of  
78 the anteromedial domain, which is covered by the superficially located Islands of Calleja. In contrast,  
79 odor cues associated with electrical shock induced aversive behavior and *c-fos* expression in the D2-  
80 expressing neurons (D2 neurons) in the cortex-like region of the anteromedial domain, as well as D1  
81 neurons in the cap and cortex-like regions of the lateral domain, which is surrounded by the cap  
82 region. These results raise the possibility that the D1 and D2 neurons in the anteromedial OT play  
83 opposing roles in odor-guided motivated behaviors. Consistent with this idea, the D1 and D2 neurons  
84 in the NAc have distinct roles in attractive and aversive learning (Hikida et al., 2010). Here, we  
85 investigated whether activation of the D1 and D2 neurons induces attractive and aversive behaviors,  
86 respectively, by combining optogenetic stimulation and real-time place preference (RTPP) tests  
87 (Zhang et al., 2017a).

88

## 89 2 Materials and Methods

### 90 Animals

91 All experiments were conducted in accordance with the Guidelines for Animal Experimentation in  
92 Neuroscience of the Japan Neuroscience Society, and were approved by the Experimental Animal  
93 Research Committee of University of Fukui. The D1-Cre and D2-Cre mice used were heterozygotes  
94 and bred from D1-Cre (the Mutant Mouse Resource & Research Centers, STOCK Tg(Drd1a-  
95 cre)FK150Gsat/Mmucd, stock number: 029178-UCD) (Gong et al., 2003; Gong et al., 2007) and D2-  
96 Cre (the Mutant Mouse Resource & Research Centers, B6.FVB(Cg)-Tg(Drd2-  
97 cre)ER44Gsat/Mmucd, stock number: 032108-UCD) (Gong et al., 2003; Gong et al., 2007) by  
98 mating the heterozygote transgenic mice with wild type C57BL/6J mice (Japan SLC). All mice were  
99 housed with their littermates until the surgery and then individually housed with a 12/12-h light/dark  
100 cycle. Food and water were freely available.

### 101 Virus preparation

102 We used a Cre-dependent adeno-associated virus (AAV) vector encoding enhanced yellow  
103 fluorescent protein (EYFP) or ChETA(ChR2/E123T)-EYFP for cell type-specific gene delivery. We  
104 obtained AAV5-EF1a-DIO-EYFP from the UNC vector core at a titer of  $3.5 \times 10^{12}$  genome  
105 copies/mL; AAV2-EF1a-DIO-ChETA-EYFP was packaged and concentrated to a titer of  $1.6 \times 10^{12}$   
106 genome copies/mL, as previously reported (Kobayashi et al., 2016), using the Addgene (Cambridge,  
107 MA, USA) plasmid, pAAV-Ef1a-DIO ChETA-EYFP (gift from Karl Deisseroth, # 26968 (Gunaydin  
108 et al., 2010)).

### 109 Stereotaxic surgery

110 Stereotaxic surgeries were performed on mice aged 10–16 weeks. Mice were anesthetized with a  
111 mixture of three anesthetics (medetomidine, midazolam, and butorphanol) (Nakamura et al., 2017),  
112 and then placed in a stereotaxic apparatus (Narishige, SR-5M). The skull above the targeted areas  
113 was thinned using a dental drill and removed carefully. Injections were administered using a syringe  
114 pump (WPI, UltraMicroPump III) connected to a Hamilton syringe (Hamilton, RN-1701), and a  
115 mounted glass micropipette with a tip diameter of 50  $\mu$ m connected by an adaptor (Hamilton, 55750-  
116 01).

117 We ipsilaterally injected 300 nL AAV5-EF1a-DIO-EYFP for confirmation of cell type-  
118 specific expression (Fig. 1C–D) and as a control for optogenetic stimulation, or AAV2-EF1a-DIO-  
119 ChETA-EYFP into the anteromedial OT of D1-Cre or D2-Cre mice using the following coordinates:  
120 anterior-posterior, +1.5 mm; medial-lateral, 0.7 mm from bregma; and dorso-ventral, 4.35 mm from  
121 the brain surface. Two to 3 weeks later, the mice were ipsilaterally implanted with a chronic optical  
122 fiber (numerical aperture = 0.39, 200- $\mu$ m diameter; Thorlabs, CFMC12U) targeted to the  
123 anteromedial OT with the same coordinates described above. One to 2 weeks after fiber implantation,  
124 the following behavioral tests were conducted.

### 125 Optogenetic stimulation and RTPP tests

126 For optogenetic stimulation, the implanted optic fiber was connected to a blue light laser via patch  
127 cords with a fiber-optic rotary joint (Thorlabs, RJPSF2). All photo-stimulation experiments used 5-  
128 ms, 5–7-mW, 473-nm light pulses at 20 Hz via a solid-state laser for light delivery (Ultra Laser,  
129 CST-L-473-50-OEM) triggered by a stimulator (Bio Research Center, STO2).

130 After being connected to the blue light laser, the mice were placed in a place preference  
131 chamber (30 [width] × 30 [depth] × 25 [height] cm) equipped with vertical or horizontal striped wall,  
132 as shown in Fig. 1B, for 20 min. The non-stimulation control side was as assigned at the start of the  
133 experiment. Laser stimulation at 20 Hz was constantly delivered when the mice crossed to the  
134 stimulation side, and stopped when they returned back to the initial non-stimulation side. All  
135 behavioral tests were recorded using a USB digital video camera (Logicool c920r), and offline  
136 analyses of the time spent in each chamber and tracking data were performed using a videotracking  
137 software (Panlab, SMART 3.0); 30 min after the end of the RTPP tests, mice were deeply  
138 anesthetized by intraperitoneal injection of sodium pentobarbital, and then fixed for histochemical  
139 analysis.

## 140 **Histochemistry**

141 Mice were transcardially perfused with phosphate-buffered saline (PBS), followed by 4%  
142 paraformaldehyde (PFA). After cryoprotection with sucrose solution, the brain was frozen and sliced  
143 into coronal sections with a thickness of 20  $\mu$ m. The sections were rinsed in PBS and 0.1 M  
144 phosphate buffer, mounted on glass slides using a paint brush, dried overnight in a vacuum  
145 desiccator, and then stored at 4 °C until histochemistry.

146 To confirm cell type-specific EYFP expression, we performed double fluorescent  
147 immunolabelling for EYFP and mRNAs of D1 or D2 as follows. Digoxigenin (DIG)-labeled RNA  
148 probes were prepared using an *in vitro* transcription kit (Roche) according to the manufacturer's  
149 protocol with a plasmid kindly provided by Dr. Kazuto Kobayashi (Sano et al., 2003). The dried  
150 sections were fixed in 4% PFA, digested using proteinase K (10  $\mu$ g/mL) for 30 min, and post-fixed in  
151 4% PFA. After prehybridization, the sections were incubated overnight at 65 °C with DIG-labelled  
152 RNA probes. After stringent washing, the sections were incubated in 1% blocking buffer (Roche,  
153 11096176001) for 1 h. Primary antibody against EYFP (1:1000; Medical & Biological Laboratories)  
154 and an anti-DIG antibody conjugated with alkaline phosphatase (1:500, Roche) were included in the  
155 incubation mixture. The sections were washed three times in TNT (0.1 M Tris-HCl [pH 7.5], 0.15 M  
156 NaCl, 0.1% Tween 20) and incubated with an Alexa Fluor 488-conjugated secondary antibody  
157 (1:400; Jackson ImmunoResearch Labs) for 2 h. After three washes in TNT and one wash in Tris  
158 saline (0.1 M Tris-HCl [pH 8.0], 0.1 M NaCl, 50 mM MgCl<sub>2</sub>), alkaline phosphatase activity was  
159 detected using the HNPP Fluorescence Detection Set (Roche, 11758888001) according to the  
160 manufacturer's instructions. The sections were incubated with the substrate three times for 30 min  
161 each, and the reaction was stopped by washing the sections in PBS. The sections were then  
162 counterstained with 4',6-diamidino-2-phenylindole diluted in PBS (2  $\mu$ g/mL) for 5 min. After  
163 washing in PBS, the sections were mounted in PermaFluor (Thermo Fisher Scientific).

164 For *c-fos* mRNA detection, we performed *in situ* hybridization using DIG-labeled antisense  
165 RNA probes. The RNA probe was prepared using an *in vitro* transcription kit (Roche) according to  
166 the manufacturer's protocol with a plasmid kindly provided by Dr. Hirohide Takebayashi (Bepari et  
167 al., 2012). Hybridization and washing were performed as described above. Subsequently, the sections  
168 were blocked with 10% normal sheep serum, 1% bovine serum albumin, and 0.1% Triton X-100 in  
169 PBS. Subsequently, the sections were incubated overnight at 4 °C with alkaline phosphatase-  
170 conjugated anti-DIG antibody (1:1000, Roche). The sections were washed in TNT, followed by  
171 alkaline phosphatase buffer (100 mM NaCl, 100 mM Tris-HCl [pH 9.5], 50 mM MgCl<sub>2</sub>, 0.1% Tween  
172 20, 5 mM levamisole). The sections were treated overnight with nitro-blue tetrazolium/5-bromo-4-  
173 chloro-3'-indolylphosphate (Roche) mixture at room temperature in a dark room for color  
174 development. Then, they were rinsed in PBS and mounted in PermaFluor (Thermo Fisher Scientific).

175 **Microscopy and image analysis**

176 Sections were examined using a confocal laser microscope (Olympus, FV1200) and a bright field  
177 virtual slide system (Hamamatsu Photonics, NanoZoomer). To quantify density of c-fos mRNA-  
178 expressing cells, the area of the anteromedial domain of the OT was delineated, and the number of  
179 cells was counted using Image J (National Institutes of Health).

180 **Statistics**

181 Statistical significance was tested using Prism 7 (GraphPad Software). Differences were considered  
182 statistically significant at  $p < 0.05$ .

183



### 184 3 Results

185 To address whether D1 and D2 neurons in the anteromedial OT play distinct roles in attractive and  
186 aversive behaviors, we used optogenetic stimulation and performed RTPP tests (Fig. 1A and B). We  
187 injected AAV2-EF1a-DIO-ChETA-EYFP into the anteromedial OT of D1-Cre and D2-Cre  
188 transgenic mice; AAV5-EF1a-DIO-EYFP was injected as a control for optogenetic stimulation (Fig.  
189 1A). At first, we examined cell type-specificity of the Cre-mediated gene expression by the AAV  
190 vector. Three weeks after injection of AAV5-EF1a-DIO-EYFP into the anteromedial OT of the D1-  
191 Cre and D2-Cre mice, we performed double fluorescence immunolabeling of EYFP and D1 or D2  
192 mRNAs (Fig. 1C and D). In the D1-Cre mice, 94% of the EYFP(+) neurons in the cortex-like region,  
193 which were putative medium spiny neurons, expressed D1 mRNA, and 5.9% of them expressed D2  
194 mRNA (n = 3 mice, Fig. 1C and D). On the other hand, 14% of the EYFP(+) neurons expressed D1  
195 mRNA, and approximately 83% of them expressed D2 mRNA in the D2-Cre mice (n = 3 mice, Fig.  
196 1C and E). These data confirmed that these Cre transgenic mice exhibited preferential expression of  
197 Cre-dependent AAV-derived genes in the D1 and D2 neurons.

198 We then tested the hypothesis that optogenetic activation of the D1 and D2 neurons in the  
199 anteromedial OT may play distinct roles in eliciting attractive and aversive behaviors using RTPP  
200 tests. We activated the D1 and D2 neurons using ChETA, a type of ChR2 with faster kinetics  
201 (Gunaydin et al., 2010), which possibly enabled precise timing of stimulation when mice crossed the  
202 chambers. The RTPP tests revealed that D1-Cre mice expressing ChETA spent significantly longer  
203 time in the photo-stimulation side (64% of the 20-min RTPP tests, n = 6 mice) than the control mice  
204 (52% of the 20-min RTPP tests, n = 7 mice; unpaired *t*-test:  $t = 3.261$ ,  $df = 11$ ) which expressed  
205 EYFP without ChETA (Fig. 2A and B). In contrast, D2-Cre mice expressing ChETA spent  
206 significantly shorter time in the photo-stimulation side (28% of the 20-min RTPP tests, n = 6 mice)  
207 than the control mice (51% of the 20-min RTPP tests, n = 7 mice; unpaired *t*-test:  $t = 3.994$ ,  $df = 11$ )  
208 (Fig. 2A and B). These data suggest that activation of the D1 and D2 neurons in the anteromedial OT  
209 elicit attractive and aversive behaviors, respectively.

210 After the RTPP tests, we confirmed the neural activation of the anteromedial OT by examining  
211 *c-fos* mRNA expression (Bepari et al., 2012). As expected, the ipsilateral side of the anteromedial OT  
212 showed a significant increase in the number of *c-fos* expressing cells in in both ChETA-EYFP-  
213 expressing D1-Cre (n = 5 mice; unpaired *t*-test:  $t = 4.628$ ,  $df = 8$ ) and D2-Cre (n = 6 mice; unpaired *t*-  
214 test:  $t = 4.427$ ,  $df = 10$ ) mice (Fig. 2C and D). In contrast, no clear increase in the *c-fos* expression in  
215 either control D1-Cre (n = 7 mice; unpaired *t*-test:  $t = 1.239$ ,  $df = 12$ ) or D2-Cre (n = 7 mice;  
216 unpaired *t*-test:  $t = 0.7561$ ,  $df = 12$ ) mice was observed (Fig. 2C and D). These results confirmed  
217 activation of the anteromedial OT by optogenetic stimulation during the RTPP tests.

218

## 219 4 Discussion

220 In this study, we demonstrate that cell type-specific activation of the D1 and D2 neurons in the  
221 anteromedial OT elicits attractive and aversive behaviors, respectively. To achieve selective  
222 manipulation of the D1 or D2 neurons, which are intermingled in the cortex-like region of the OT,  
223 we used D1-Cre and D2-Cre transgenic mouse lines and Cre-dependent AAV vectors (Fig. 1A and  
224 C–E). This combination enabled us to deliver AAV-derived genes preferentially to the D1 or D2  
225 neurons in the anteromedial OT. Optogenetic activation of the D1 and D2 neurons in the  
226 anteromedial OT induced attraction to and aversion from the photo-stimulation chamber, respectively  
227 (Figs. 1B, and 2A and B). After the RTPP tests, activation of the anteromedial OT was confirmed by  
228 local increase in the c-fos expression (Fig. 2C and D). These results suggest that the D1 and D2  
229 neurons in the anteromedial OT are involved in eliciting attractive and aversive behaviors,  
230 respectively.

231 Previous studies have shown that the anteromedial domain of the OT plays an important role  
232 in the reward system. Local self-administration of cocaine into the OT and NAc revealed that the  
233 anteromedial domain of the OT more robustly mediates the rewarding action of cocaine than other  
234 domains of the OT and NAc (Ikemoto, 2003). Optogenetic stimulation of the dopaminergic fiber  
235 from the ventral tegmental area to the medial OT elicits rewarding effects which generate place and  
236 odor preference (Zhang et al., 2017a). These local manipulations should exert excitatory effect on the  
237 D1 neurons via increased dopamine level in the anteromedial OT because D1 is coupled with Gs  
238 (Stoof and Keibian, 1981). In line with these previous reports, our result directly demonstrates the  
239 role of the D1 neurons in the anteromedial OT in eliciting attractive behavior. In contrast, D2 is  
240 coupled with Gi (Stoof and Keibian, 1981). Aversive stimuli reduce tonic firings of dopaminergic  
241 neurons (Ungless et al., 2004; Cohen et al., 2012) resulting in decreased ambient dopamine level at  
242 the target structure, which should exert excitatory effect on the D2 neurons. Consistent with the  
243 report that blunting the tonic dopamine release in the ventromedial striatum leads to conditioned  
244 place aversion (Liu et al., 2008), our results reveal the role of the D2 neurons in the anteromedial OT  
245 in eliciting aversive behavior. As we previously reported, neurons in the OT are activated by odor  
246 cues that induce motivated behaviors. The understanding of these cell type-specific roles of the D1  
247 and D2 neurons in the anteromedial OT will provide a neural basis for odor-guided adaptive  
248 motivated behaviors.

249



250 **5 Conflict of Interest**

251 The authors declare that the research was conducted in the absence of any commercial or financial  
252 relationships that could be construed as a potential conflict of interest.

253 **6 Author Contributions**

254 KM designed research, performed experiments, and wrote the manuscript. TK performed  
255 experiments. YF, KK, AY, TH, HM, and MY contributed tools and reagents, and assisted in revision  
256 of the manuscript.

257 **7 Funding**

258 KM was supported by the Narishige Neuroscience Research Foundation, Takeda Science  
259 Foundation, Cosmetology Research Foundation, and JSPS KAKENHI Grant Numbers 25830032,  
260 26120709, 16K18377, 16H01671, 17KK0190, 18H05005. Y.F. was supported by JSPS KAKENHI  
261 Grant Numbers 15H01282, 16H04662.

262 **8 Acknowledgments**

263 We thank Drs. Kazuto Kobayashi, Hirohide Takebayashi and Karl Deisseroth for their generous gift  
264 of the plasmids for RNA probes and AAV production. We also thank Hideki Yoshikawa, Eri Murai,  
265 Noriko Funabashi, and members of the Fukazawa Laboratory and Life Science Research Laboratory  
266 at University of Fukui for technical assistance.

267

268 **9 References**

- 269 Bepari, A.K., Watanabe, K., Yamaguchi, M., Tamamaki, N., and Takebayashi, H. (2012).  
270 Visualization of odor-induced neuronal activity by immediate early gene expression. *BMC Neurosci*  
271 13, 140. doi: 10.1186/1471-2202-13-140.
- 272 Cohen, J.Y., Haesler, S., Vong, L., Lowell, B.B., and Uchida, N. (2012). Neuron-type-specific  
273 signals for reward and punishment in the ventral tegmental area. *Nature* 482(7383), 85-88. doi:  
274 10.1038/nature10754.
- 275 de Vente, J., Hani, L., Steinbusch, H.E., and Steinbusch, H.W. (2001). The three dimensional  
276 structure of the islands of Calleja: a single heterogenous cell complex. *Neuroreport* 12(3), 565-568.
- 277 DiBenedictis, B.T., Olugbemi, A.O., Baum, M.J., and Cherry, J.A. (2015). DREADD-Induced  
278 Silencing of the Medial Olfactory Tubercle Disrupts the Preference of Female Mice for Opposite-Sex  
279 Chemosignals(1,2,3). *eNeuro* 2(5). doi: 10.1523/ENEURO.0078-15.2015.
- 280 Doty, R.L. (1986). Odor-guided behavior in mammals. *Experientia* 42(3), 257-271.
- 281 Fallon, J.H., Riley, J.N., Sipe, J.C., and Moore, R.Y. (1978). The islands of Calleja: organization and  
282 connections. *J Comp Neurol* 181(2), 375-395. doi: 10.1002/cne.901810209.
- 283 Gadziola, M.A., Tylicki, K.A., Christian, D.L., and Wesson, D.W. (2015). The olfactory tubercle  
284 encodes odor valence in behaving mice. *J Neurosci* 35(11), 4515-4527. doi:  
285 10.1523/JNEUROSCI.4750-14.2015.
- 286 Gong, S., Doughty, M., Harbaugh, C.R., Cummins, A., Hatten, M.E., Heintz, N., et al. (2007).  
287 Targeting Cre recombinase to specific neuron populations with bacterial artificial chromosome  
288 constructs. *J Neurosci* 27(37), 9817-9823. doi: 10.1523/JNEUROSCI.2707-07.2007.
- 289 Gong, S., Zheng, C., Doughty, M.L., Losos, K., Didkovsky, N., Schambra, U.B., et al. (2003). A  
290 gene expression atlas of the central nervous system based on bacterial artificial chromosomes. *Nature*  
291 425(6961), 917-925. doi: 10.1038/nature02033.
- 292 Gunaydin, L.A., Yizhar, O., Berndt, A., Sohal, V.S., Deisseroth, K., and Hegemann, P. (2010).  
293 Ultrafast optogenetic control. *Nat Neurosci* 13(3), 387-392. doi: 10.1038/nn.2495.
- 294 Heimer, L. (1978). "The Olfactory Cortex and the Ventral Striatum," in *Limbic Mechanisms.*, 95-  
295 187.
- 296 Hikida, T., Kimura, K., Wada, N., Funabiki, K., and Nakanishi, S. (2010). Distinct roles of synaptic  
297 transmission in direct and indirect striatal pathways to reward and aversive behavior. *Neuron* 66(6),  
298 896-907. doi: 10.1016/j.neuron.2010.05.011.
- 299 Hosoya, Y., and Hirata, Y. (1974). The fine structure of the "dwarf-cell cap" of the olfactory tubercle  
300 in the rat's brain. *Arch Histol Jpn* 36(5), 407-423.
- 301 Ikemoto, S. (2003). Involvement of the olfactory tubercle in cocaine reward: intracranial self-  
302 administration studies. *J Neurosci* 23(28), 9305-9311.

- 303 Ikemoto, S. (2007). Dopamine reward circuitry: two projection systems from the ventral midbrain to  
304 the nucleus accumbens-olfactory tubercle complex. *Brain Res Rev* 56(1), 27-78. doi:  
305 10.1016/j.brainresrev.2007.05.004.
- 306 Inokuchi, K., Imamura, F., Takeuchi, H., Kim, R., Okuno, H., Nishizumi, H., et al. (2017). Nrp2 is  
307 sufficient to instruct circuit formation of mitral-cells to mediate odour-induced attractive social  
308 responses. *Nat Commun* 8, 15977. doi: 10.1038/ncomms15977.
- 309 Kobayakawa, K., Kobayakawa, R., Matsumoto, H., Oka, Y., Imai, T., Ikawa, M., et al. (2007). Innate  
310 versus learned odour processing in the mouse olfactory bulb. *Nature* 450(7169), 503-508. doi:  
311 10.1038/nature06281.
- 312 Kobayashi, K., Sano, H., Kato, S., Kuroda, K., Nakamuta, S., Isa, T., et al. (2016). Survival of  
313 corticostriatal neurons by Rho/Rho-kinase signaling pathway. *Neurosci Lett* 630, 45-52. doi:  
314 10.1016/j.neulet.2016.07.020.
- 315 Liu, Z.H., Shin, R., and Ikemoto, S. (2008). Dual role of medial A10 dopamine neurons in affective  
316 encoding. *Neuropsychopharmacology* 33(12), 3010-3020. doi: 10.1038/npp.2008.4.
- 317 Millhouse, O.E., and Heimer, L. (1984). Cell configurations in the olfactory tubercle of the rat. *J*  
318 *Comp Neurol* 228(4), 571-597. doi: 10.1002/cne.902280409.
- 319 Murata, K., Kanno, M., Ieki, N., Mori, K., and Yamaguchi, M. (2015). Mapping of Learned Odor-  
320 Induced Motivated Behaviors in the Mouse Olfactory Tubercle. *J Neurosci* 35(29), 10581-10599.  
321 doi: 10.1523/JNEUROSCI.0073-15.2015.
- 322 Murofushi, W., Mori, K., Murata, K., and Yamaguchi, M. (2018). Functional development of  
323 olfactory tubercle domains during weaning period in mice. *Sci Rep* 8(1), 13204. doi:  
324 10.1038/s41598-018-31604-1.
- 325 Nakamura, T., Karakida, N., Dantsuka, A., Ichii, O., Elewa, Y.H.A., Kon, Y., et al. (2017). Effects of  
326 a mixture of medetomidine, midazolam and butorphanol on anesthesia and blood biochemistry and  
327 the antagonizing action of atipamezole in hamsters. *J Vet Med Sci* 79(7), 1230-1235. doi:  
328 10.1292/jvms.17-0210.
- 329 Poulin, J.F., Caronia, G., Hofer, C., Cui, Q., Helm, B., Ramakrishnan, C., et al. (2018). Mapping  
330 projections of molecularly defined dopamine neuron subtypes using intersectional genetic  
331 approaches. *Nat Neurosci* 21(9), 1260-1271. doi: 10.1038/s41593-018-0203-4.
- 332 Saito, H., Nishizumi, H., Suzuki, S., Matsumoto, H., Ieki, N., Abe, T., et al. (2017). Immobility  
333 responses are induced by photoactivation of single glomerular species responsive to fox odour TMT.  
334 *Nat Commun* 8, 16011. doi: 10.1038/ncomms16011.
- 335 Sano, H., Yasoshima, Y., Matsushita, N., Kaneko, T., Kohno, K., Pastan, I., et al. (2003). Conditional  
336 ablation of striatal neuronal types containing dopamine D2 receptor disturbs coordination of basal  
337 ganglia function. *J Neurosci* 23(27), 9078-9088.
- 338 Shepherd, G.M. (2004). *The Synaptic Organization of the Brain*. Oxford University Press.

- 339 Stoof, J.C., and Keibian, J.W. (1981). Opposing roles for D-1 and D-2 dopamine receptors in efflux  
340 of cyclic AMP from rat neostriatum. *Nature* 294(5839), 366-368.
- 341 Ungless, M.A., Magill, P.J., and Bolam, J.P. (2004). Uniform inhibition of dopamine neurons in the  
342 ventral tegmental area by aversive stimuli. *Science* 303(5666), 2040-2042. doi:  
343 10.1126/science.1093360.
- 344 Xiong, A., and Wesson, D.W. (2016). Illustrated Review of the Ventral Striatum's Olfactory  
345 Tubercle. *Chem Senses* 41(7), 549-555. doi: 10.1093/chemse/bjw069.
- 346 Yamaguchi, M. (2017). Functional Sub-Circuits of the Olfactory System Viewed from the Olfactory  
347 Bulb and the Olfactory Tubercle. *Front Neuroanat* 11, 33. doi: 10.3389/fnana.2017.00033.
- 348 Yung, K.K., Bolam, J.P., Smith, A.D., Hersch, S.M., Ciliax, B.J., and Levey, A.I. (1995).  
349 Immunocytochemical localization of D1 and D2 dopamine receptors in the basal ganglia of the rat:  
350 light and electron microscopy. *Neuroscience* 65(3), 709-730.
- 351 Zhang, Z., Liu, Q., Wen, P., Zhang, J., Rao, X., Zhou, Z., et al. (2017a). Activation of the  
352 dopaminergic pathway from VTA to the medial olfactory tubercle generates odor-preference and  
353 reward. *Elife* 6. doi: 10.7554/eLife.25423.
- 354 Zhang, Z., Zhang, H., Wen, P., Zhu, X., Wang, L., Liu, Q., et al. (2017b). Whole-Brain Mapping of  
355 the Inputs and Outputs of the Medial Part of the Olfactory Tubercle. *Front Neural Circuits* 11, 52.  
356 doi: 10.3389/fncir.2017.00052.
- 357

358 **10 Figure Legends**

359 **Figure 1. Cell type-specific gene delivery in dopamine receptor D1- and D2-expressing neurons**  
360 **in the anteromedial OT of the D1-Cre and D2-Cre mice using AAV vectors**

361 (A) Schematic diagram of cell type-specific optogenetic stimulation of the anteromedial OT. We  
362 injected Cre-dependent AAVs encoding EYFP or ChETA-EYFP and implanted optic fiber canula  
363 into the anteromedial OT of D1-Cre or D2-Cre mice. (B) Place preference chamber. In the RTPP  
364 tests, mice were placed in either side, which was assigned as the control side (no photo-stimulation).  
365 Blue light was delivered when mice were in the opposite side of the initial position. (C) and (D)  
366 Confocal images of AAV-derived EYFP expressing cells (green) and D1 (upper panels) or D2 (lower  
367 panels) mRNAs (red) from D1-Cre mouse (C) or D2-Cre mouse (D). Color merged panel contains  
368 DAPI staining (blue). Scale bars: 20  $\mu\text{m}$ . (E) Percentage of D1 or D2 mRNA expressing-cells among  
369 EYFP-expressing cells in D1-Cre and D2-Cre mice. Data shows mean with SD. OT, olfactory  
370 tubercle; AAV, adeno-associated virus; EYFP, enhanced yellow fluorescent protein; RTPP, real-time  
371 place preference; D1, dopamine receptor D1; D2, dopamine receptor D2; DAPI, 4',6-diamidino-2-  
372 phenylindole; SD, standard deviation

373 **Figure 2. Cell type-specific effect of optogenetic stimulation of the anteromedial OT in the**  
374 **RTPP tests**

375 (A) Tracking data of the RTPP tests. Right side is the photo-stimulation side. (B) Percentage of time  
376 spent in the photo-stimulation side in the 20-min RTPP tests. Data shows mean with SD. \*\*,  $p <$   
377 0.01. (C) Images of c-fos mRNA expression in the OT coronal sections after the RTPP tests. Left  
378 panels, ipsilateral; right panels, contralateral. Scale bar: 200  $\mu\text{m}$ . (D) Density of c-fos mRNA-  
379 expressing cells in the anteromedial OT. Data shows mean with SD. ns, not significant; \*,  $p <$  0.05;  
380 \*\*,  $p <$  0.01. OT, olfactory tubercle; RTPP, real-time place preference; SD, standard deviation



Figure 1

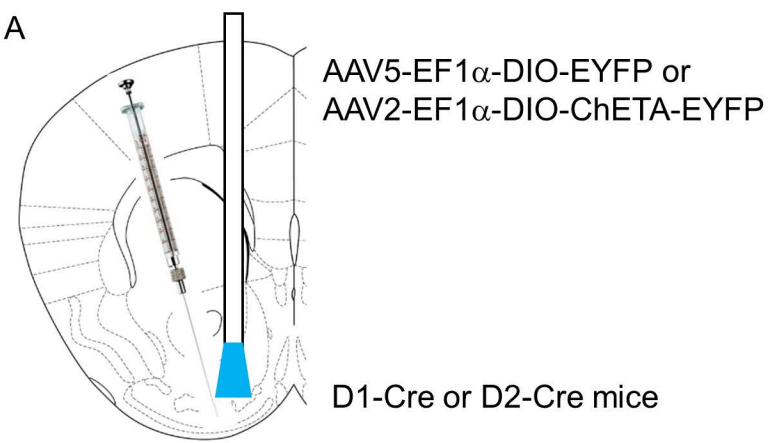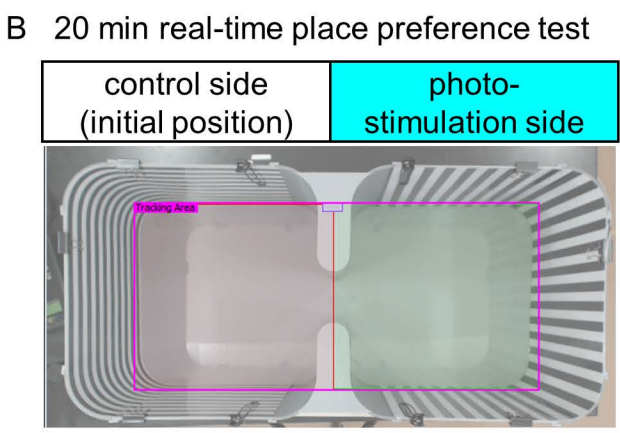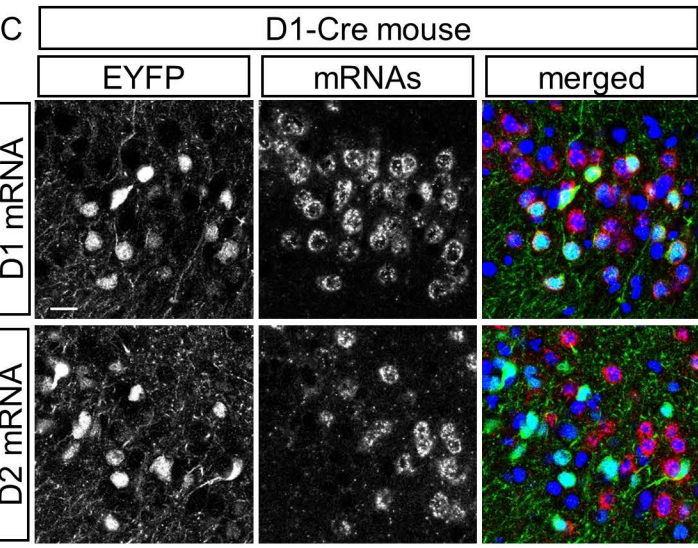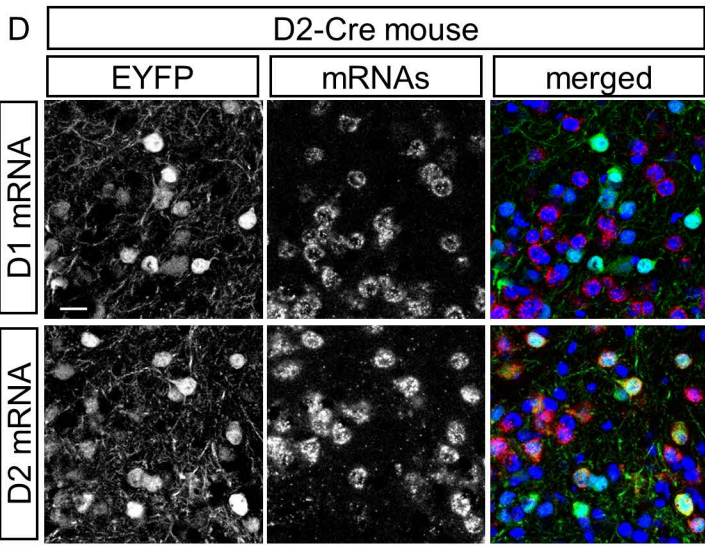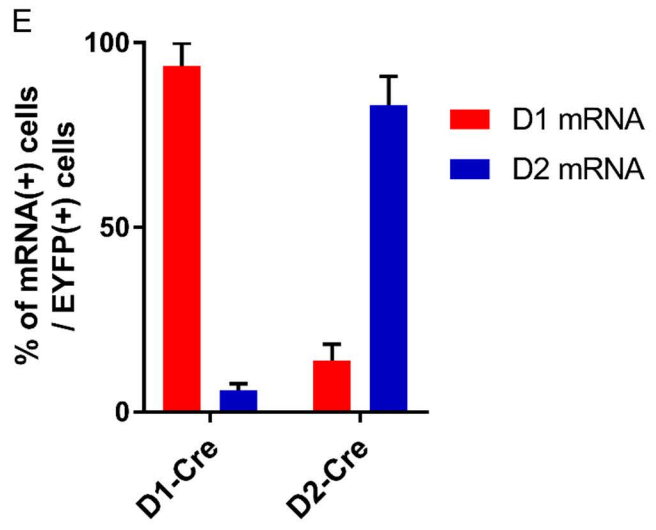



Figure 2

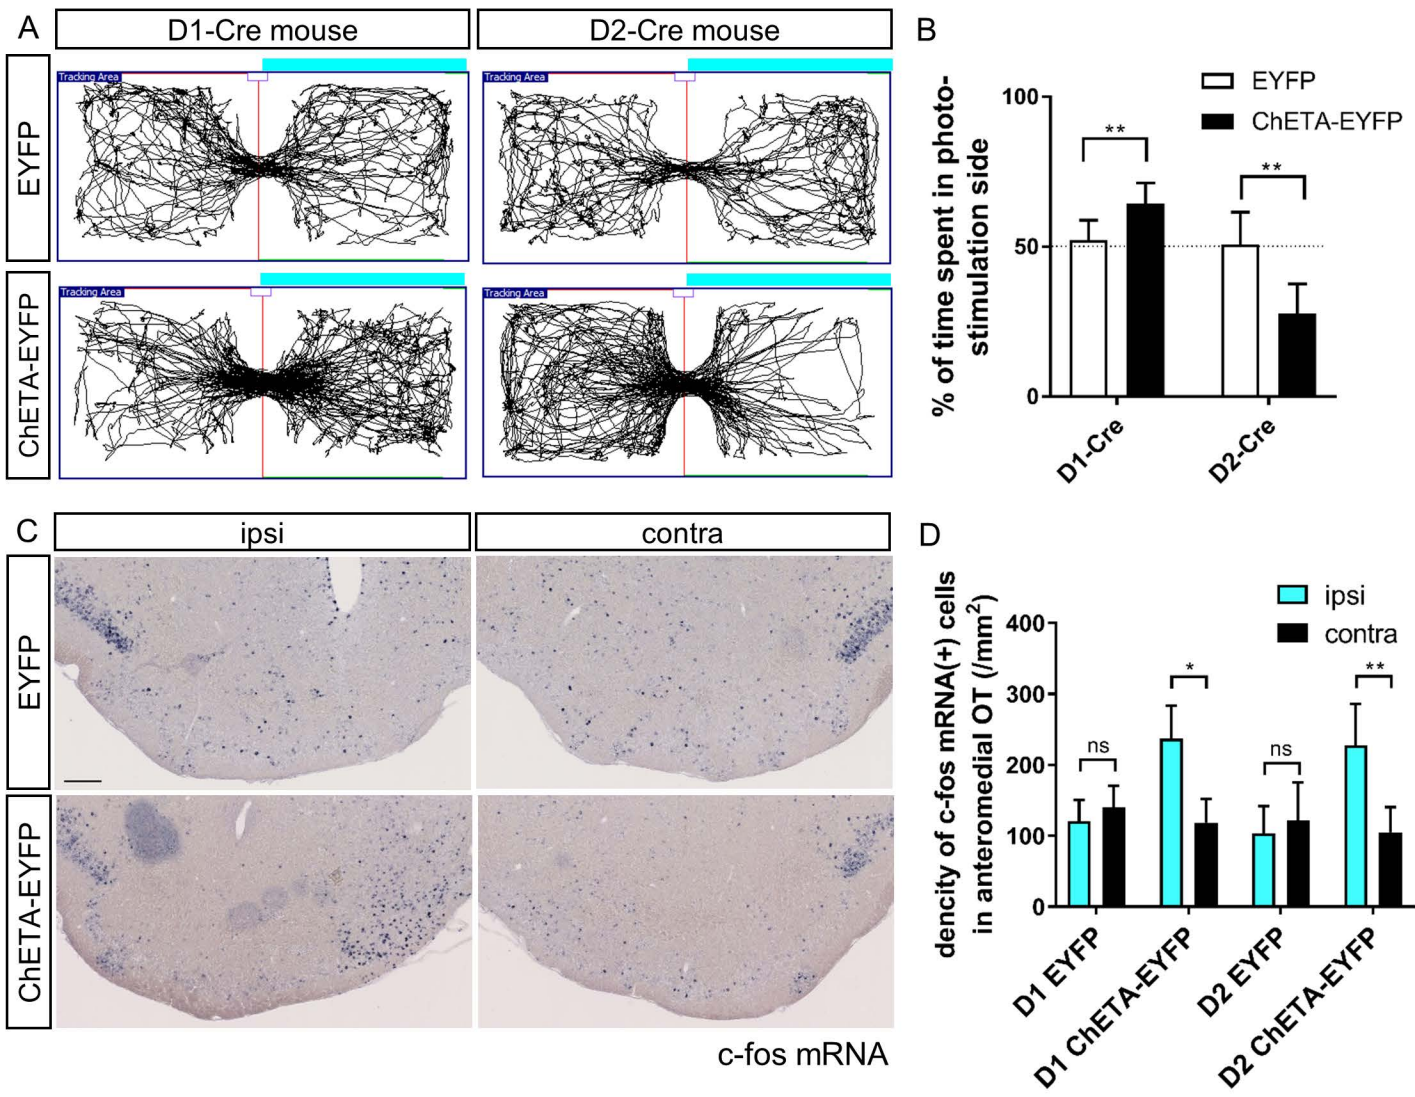

Source: https://www.biorxiv.org/content/10.1101/421602v1.full.pdf
